# Supplementary material
Source: HighWire-hosted journal article supplement (http://www.qdcxjkg.com/highwire/filestream/126495/field_highwire_adjunct_files/11/ERJ-00937-2015_Table_S3.pdf)
Supplement: ERJ-00937-2015_Table_S3.pdf [file ERJ-00937-2015_Table_S3.pdf]

Supplementary Table S3: Multivariate survival analyses for histologic type

|                        |                         | <b>HR</b> | <b>lower CI (95%)</b> | <b>upper CI (95%)</b> | <b>p-value</b> |
|------------------------|-------------------------|-----------|-----------------------|-----------------------|----------------|
| <b>Age</b>             | <i>per year</i>         | 1.031     | 1.012                 | 1.051                 | 0.001          |
| <b>Sex</b>             | <i>Female</i>           | 1         |                       |                       | 0.227          |
|                        | <i>Male</i>             | 1.313     | 0.844                 | 2.041                 |                |
| <b>Stage</b>           | <i>UICC 1</i>           | 1         |                       |                       | <0.001         |
|                        | <i>UICC 2</i>           | 1.537     | 1.054                 | 2.240                 |                |
|                        | <i>UICC 3</i>           | 2.631     | 1.798                 | 3.852                 |                |
|                        | <i>UICC 4</i>           | 3.835     | 1.178                 | 12.487                |                |
| <b>Histologic type</b> | <i>non-keratinizing</i> | 1         |                       |                       | 0.011          |
|                        | <i>keratinizing</i>     | 1.550     | 1.136                 | 2.114                 |                |
|                        | <i>basaloid</i>         | 0.670     | 0.245                 | 1.830                 |                |
